# Supplementary material for: Adjusting the perfluorinated side chain length in dual-grafted anion exchange membranes for high performance fuel cells
Source: Royal Society of Chemistry journal article supplement (doi:10.1039/d3ta06400j), 2023-12-27
Supplement: d3ta06400j1.pdf [file d3ta06400j1.pdf]

## Electronic Supplementary Information (ESI)

### Adjusting perfluorinated side chain length in dual-grafted anion exchange membranes for high performance fuel cells

Shoutao Gong<sup>a,b</sup>, Long Han<sup>a,b</sup>, Xinli Zhang<sup>a,b</sup>, Quan Jin<sup>a,b</sup>, Gaohong He<sup>a,b</sup> and Fengxiang Zhang<sup>a,b\*</sup>

<sup>a</sup> State key laboratory of fine chemicals, Dalian University of Technology, Dalian 116024, China

<sup>b</sup> School of Chemical Engineering, Dalian University of Technology, Panjin 124221, China.

\*Correspondence: [zhangfx@dlut.edu.cn](mailto:zhangfx@dlut.edu.cn)

### Content

- 1 Syntheses of I-2O-Pip and poly (biphenyl piperidinium) or PBP.
- 2 Chemical structure.
- 3 Thermal stability and mechanical properties.
- 4 Performance of PBP.
- 5 Performance comparison.

## 1 Syntheses of I-2O-Pip and PBP.

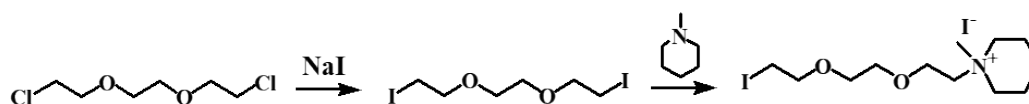

**Scheme S1** Preparation of I-2O-Pip.

For the synthesis of PBP, biphenyl (1.902 g, 10 mmol) and N-methyl-4-piperidone (1.37 mL, 12 mmol) were dissolved in 4 mL dichloromethane; then TFA (1 mL, 13.5 mmol) and TFSA (7.2 mL, 90 mmol) were added dropwise under an ice bath and reacted for 3 h. The viscous polymer solution was precipitated in deionized water, washed to neutral and vacuum dried at 60 °C to get white solid. Above solid (1 g) was dissolved in 20 mL DMSO, 0.8 mL iodomethane and 0.8 g K<sub>2</sub>CO<sub>3</sub> were added, and the mixture was stirred at 40 °C for 24 h. The solution was then precipitated in ethyl acetate and washed repeatedly with deionized water. The product was vacuum dried at 60 °C to obtain PBP. The synthetic route is illustrated in **Scheme S2**. A 5 wt.% DMSO solution of PBP was used as fuel cell binder.

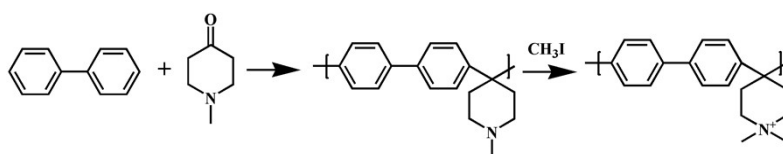

**Scheme S2** Synthesis of PBP.

## 2 Chemical structure

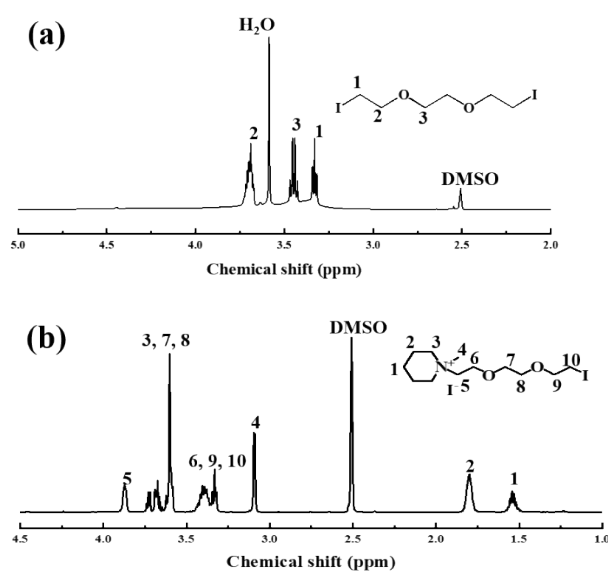

**Fig. S1** <sup>1</sup>H NMR spectra of (a) I-2O and (b) I-2O-Pip.

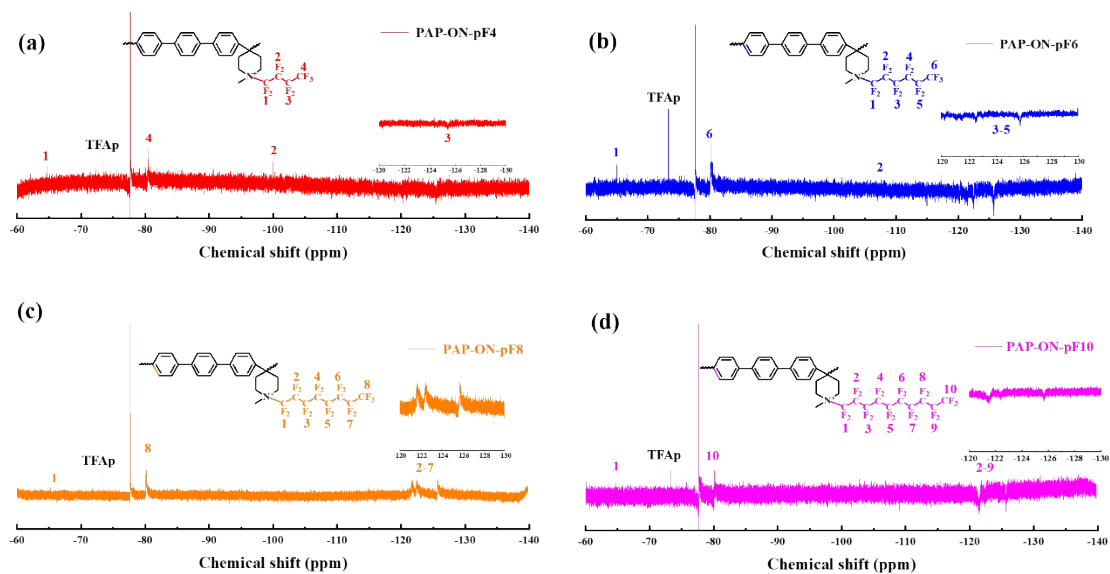

Fig. S2  $^{19}\text{F}$  NMR spectra of PAP-ON-pFx.

### 3 Thermal stability and mechanical properties

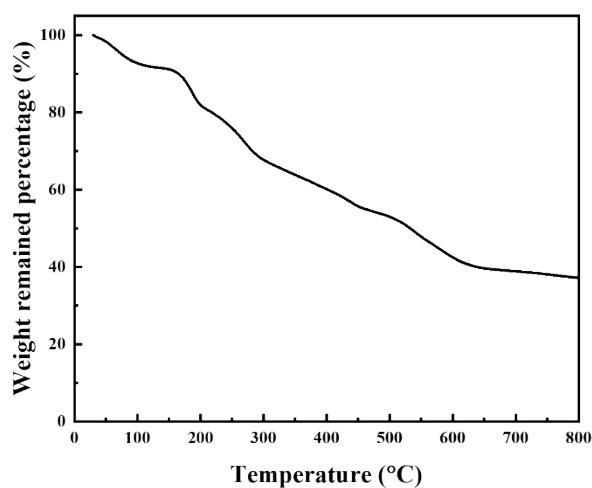

Fig. S3 TGA curve of PAP-ON-pF6 under  $\text{N}_2$  atmosphere.

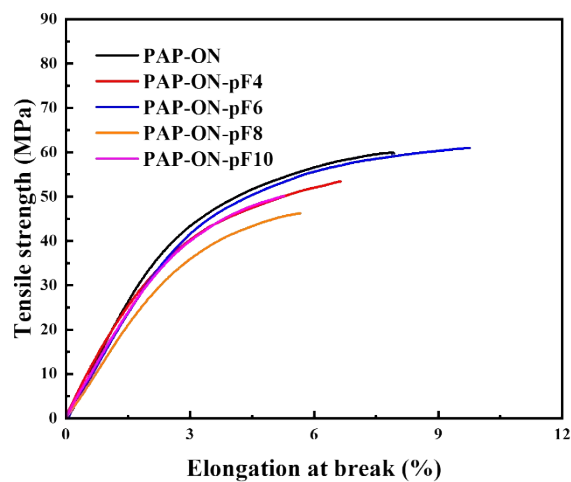

Fig. S4 Stress-strain curves of PAP-ON and PAP-ON-pFx AEMs.

#### 4 Performance of PBP

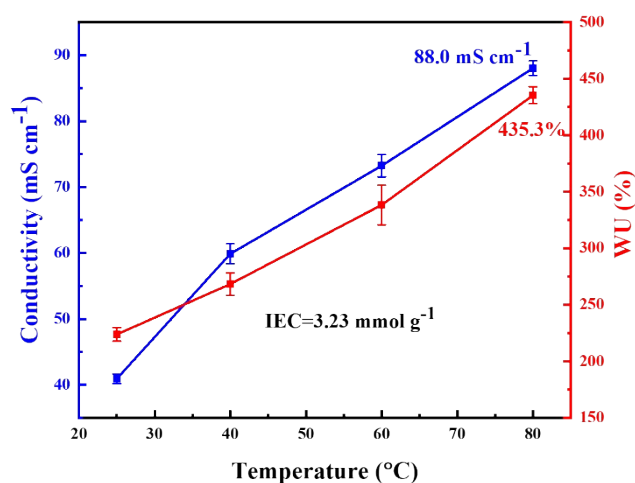

**Fig. S5** The conductivity, water uptake (WU) and ion exchange capacity (IEC) of PBP.

#### 5 Performance comparison

**Table S1** Comparison of alkali stability between PAP-ON-pF6 and other membranes.

| AEMs                    | Temperature (°C) | NaOH or KOH concentration (M) | Test time (h) | Conductivity retention (%) | Ref.      |
|-------------------------|------------------|-------------------------------|---------------|----------------------------|-----------|
| PAP-ON-pF6              | 80               | 1                             | 1000          | 95.0                       | This work |
|                         |                  | 2                             |               | 87.0                       |           |
|                         |                  | 1                             | 1600          | 90.1                       |           |
|                         |                  | 2                             |               | 80.8                       |           |
| BD <sub>3</sub> /50EVOH | 70               | 1                             | 310           | >96.0                      | 1         |
| QAPCE-16C               | 80               | 1                             | 960           | 95.8                       | 2         |
| PBPA-6-QA               | 80               | 1                             | 1000          | 97.0                       | 3         |
| s-PDTP-54               | 80               | 1                             | 1000          | 89.2                       | 4         |
| QABP-2                  | 80               | 1                             | 1000          | 88.0                       | 5         |
| qPBN-CA <sub>40</sub>   | 80               | 1                             | 1008          | 90.0                       | 6         |
| x-PFTP-DP-C5-10         | 80               | 1                             | 1200          | 90.0                       | 7         |
| C-IL-100                | 50               | 1                             | 1200          | 97.8                       | 8         |
| PITP-C10Q85             | 80               | 1                             | 1200          | 80.0                       | 9         |
| QPIT-CE <sub>0.5</sub>  | 80               | 1                             | 1200          | 85.0                       | 10        |
| PQP-100                 | 80               | 1                             | 1334          | 75.0                       | 11        |
| PDTP-10                 | 80               | 1                             | 1500          | 81.0                       | 12        |

|                                         |    |   |      |      |    |
|-----------------------------------------|----|---|------|------|----|
| QPEPTpi-35                              | 80 | 1 | 2000 | 85.0 | 13 |
| P(VCP <sub>10</sub> -TP <sub>90</sub> ) | 80 | 1 | 5000 | 93.8 | 14 |
| PHPFP-QA                                | 80 | 2 | 720  | 83.0 | 15 |
| Tec-PBI-50                              | 60 | 2 | 672  | 78.0 | 16 |
| BOC-DMI                                 | 80 | 2 | 1080 | 82.3 | 17 |
| QABNP                                   | 80 | 2 | 1080 | 90.0 | 18 |

**Table S2** Comparison between PAP-ON-pF6 and recently reported AEMs in terms of IEC, conductivity ( $\sigma$ ), normalized conductivity ( $\sigma$ /IEC) and fuel cell performance.

| AEMs                | IEC<br>(mmol g <sup>-1</sup> ) | Conductivity<br>( $\sigma$ ) at 80 °C<br>(mS cm <sup>-1</sup> ) | $\sigma$ /IEC | PPD<br>(mW<br>cm <sup>-2</sup> ) | Fuel cell durability                         |                         |             | Ref.                 |
|---------------------|--------------------------------|-----------------------------------------------------------------|---------------|----------------------------------|----------------------------------------------|-------------------------|-------------|----------------------|
|                     |                                |                                                                 |               |                                  | Current<br>density<br>(mA cm <sup>-2</sup> ) | Tempe<br>rature<br>(°C) | Time<br>(h) |                      |
| PAP-ON-<br>pF6      | 2.17                           | 134.2                                                           | 61.8          | 1066                             | 200                                          | 60                      | 140         | <b>This<br/>work</b> |
| QPEPTpi-35          | 2.91                           | 140                                                             | 48.1          | 1200                             | 200                                          | 60                      | 20          | 13                   |
| TPTP-Pip-<br>OH-20% | 2.71                           | 143.2                                                           | 52.8          | 405                              | 200                                          | 60                      | 32          | 19                   |
| PBP-6-Pip           | 3.78                           | 117.1                                                           | 31.0          | 307                              | 200                                          | 60                      | 40          | 20                   |
| PQP-100             | 2.3                            | 118.7                                                           | 51.6          | 496                              | 200                                          | 60                      | 85          | 11                   |
| PB2Pip-<br>5C8F     | 2.42                           | 168.5                                                           | 69.6          | 718                              | 100                                          | 80                      | 70          | 21                   |
| O-PDQA-3            | 1.97                           | 106                                                             | 53.8          | 1180                             | 400                                          | 70                      | 16          | 22                   |
| PDTP-10             | 2.57                           | 110                                                             | 42.8          | 621                              | 300                                          | 60                      | 18          | 12                   |
| PPTDF-QA-<br>2.5    | 2.78                           | 161.5                                                           | 58.1          | 778                              | 200                                          | 80                      | 60          | 23                   |
| QABNP               | 2.6                            | 135.3                                                           | 52.0          | 1160                             | 400                                          | 60                      | 30          | 18                   |
| QBNTP-<br>MP11      | 2.85                           | 145                                                             | 50.9          | 1410                             | 200                                          | 80                      | 100         | 24                   |
| 40%-PPT-c-<br>PmpP  | 2.19                           | 148.6                                                           | 67.9          | 1210                             | 400                                          | 60                      | 110         | 25                   |
| PTF6-<br>QATP       | 2.54                           | 142.7                                                           | 56.2          | 849                              | 300                                          | 80                      | 80          | 26                   |
| OHPTP-<br>10TBB     | 2.01                           | 136                                                             | 67.7          | 639                              | 300                                          | 60                      | 26          | 27                   |
| P(4PA-<br>co2PA)-47 | 2.07                           | 87                                                              | 42.0          | 400                              | 200                                          | 50                      | 100         | 28                   |
| BOC-TMA             | 2.21                           | 151.3                                                           | 68.5          | 546                              | 100                                          | 60                      | 110         | 17                   |
| qPBN-CA40           | 1.81                           | 122                                                             | 67.4          | 603                              | 200                                          | 60                      | 30          | 6                    |
| Cr-QPPV-<br>2.51    | 2.51                           | 135.5                                                           | 54.0          | 1270                             | 400                                          | 60                      | 100         | 29                   |

## References

1. J. Jung, Y. S. Park, D. J. Hwang, G. H. Choi, D. H. Choi, H. J. Park, C.-H. Ahn, S.

- S. Hwang and A. S. Lee, *J. Mater. Chem. A*, 2023, **11**, 10891-10900.
2. J. H. Chen, X. B. Yue, Y. S. L. Choo, Z. Yu, X. H. Wang, X. L. Gao, W. T. Gao, Q. G. Zhang, A. M. Zhu and Q. L. Liu, *J. Power Sources*, 2023, **570**, 233014.
  3. T. Wang, Y. Zhao, S. Wang, S. Cheng, S. Yang, H. Wei and Y. Ding, *J. Power Sources*, 2023, **557**, 232590.
  4. H. M. Kim, C. Hu, H. H. Wang, J. H. Park, N. Chen and Y. M. Lee, *J. Membr. Sci.*, 2022, **644**, 120109.
  5. W. Song, X. Liang, H. Zhang, X. Liu, X. Zhang, L. Wu, X. Ge and T. Xu, *J. Mater. Chem. A*, 2022, **10**, 21503-21511.
  6. L. Ma, L. Li, M. Yuan, L. Bai, A. Zhang, X. Yan, G. He and F. Zhang, *ACS Sustain. Chem. Eng.*, 2022, **10**, 5748-5757.
  7. N. Chen, J. H. Park, C. Hu, H. H. Wang, H. M. Kim, N. Y. Kang and Y. M. Lee, *J. Mater. Chem. A*, 2022, **19**, 3678–3687.
  8. X. Wang and R. G. H. Lammertink, *J. Mater. Chem. A*, 2022, **10**, 8401-8412.
  9. X. Zhou, L. Wu, G. Zhang, R. Li, X. Hu, X. Chang, Y. Shen, L. Liu and N. Li, *J. Membr. Sci.*, 2021, **631**, 119335.
  10. S. Xu, W. Wei, X. Su and R. He, *Chem. Eng. J.*, 2023, **455**, 140776.
  11. M. Liu, X. Hu, B. Hu, L. Liu and N. Li, *J. Membr. Sci.*, 2022, **642**, 119966.
  12. X. Wang, X. Qiao, S. Liu, L. Liu and N. Li, *J. Membr. Sci.*, 2022, **653**, 120558.
  13. J. Liu, L. Gao, X. Ruan, W. Zheng, X. Yan and G. He, *Chem. Eng. J.*, 2023, **471**, 144547.
  14. W. Yuan, L. Zeng, T. Zhang, Y. Zhou, J. Wang, S. Jiang, L. Li, Q. Liao and Z. Wei, *Adv. Funct. Mater.*, 2023, **33**, 2307041.
  15. F. Xu, Y. Chen, X. Cao, J. Li, B. Lin, N. Yuan and J. Ding, *J. Power Sources*, 2022, **545**, 231880.
  16. X. Wang, W. Chen, T. Li, X. Yan, Y. Zhang, F. Zhang, X. Wu, B. Pang, J. Li and G. He, *J. Mater. Chem. A*, 2021, **9**, 7522-7530.
  17. N. Xie, T. Wang, S. Du, Q. Weng, K. Zheng, T. Zhang, X. Ning, P. Chen, X. Chen and Z. An, *J. Power Sources*, 2023, **574**, 233121.
  18. W. T. Gao, X. L. Gao, W. W. Gou, J. J. Wang, Z. H. Cai, Q. G. Zhang, A. M. Zhu

- and Q. L. Liu, *J. Membr. Sci.*, 2022, **655**, 120578.
19. Q. Liu, S. Zhang, L. Tian, J. Li, W. Ma, F. Wang, Z. Wang, J. Li and H. Zhu, *J. Power Sources*, 2023, **564**, 232822.
  20. Q. Liu, W. Ma, L. Tian, J. Li, L. Yang, F. Wang, Z. Wang, J. Li, Z. Wang and H. Zhu, *J. Power Sources*, 2022, **551**, 232105.
  21. G. Xu, J. Pan, X. Zou, Z. Jin, J. Zhang, P. Fang, Q. Zhang, Z. Sun and F. Yan, *Adv. Funct. Mater.*, 2023, **33**, 2302364.
  22. J. Zhang, K. Zhang, X. Liang, W. Yu, X. Ge, M. A. Shehzad, Z. Ge, Z. Yang, L. Wu and T. Xu, *J. Mater. Chem. A*, 2021, **9**, 327-337.
  23. X. Li, B. Zhang, J. Guo, Y. Chen, L. Dai, J. Zheng, S. Li and S. Zhang, *J. Mater. Chem. A*, 2023, **11**, 10738-10747.
  24. W. Ting Gao, X. Lang Gao, Y. Shuen Lann Choo, J. Jun Wang, Z. Hong Cai, Q. Gen Zhang, A. Mei Zhu and Q. Lin Liu, *Chem. Eng. J.*, 2023, **466**, 143107.
  25. Y. Zhang, F. Zhang, Y. Chen, L. Sun, C. Wei, H. Zhang, H. Zhang, B. Ye, L. Wu, X. Ge and T. Xu, *Chem. Eng. J.*, 2023, **455**, 140938.
  26. Z. Yu, W. T. Gao, Y. J. Liu, Q. G. Zhang, A. M. Zhu and Q. L. Liu, *J. Colloid Interface Sci.*, 2023, **651**, 404-414.
  27. X. Su, S. Nan, W. Wei, S. Xu and R. He, *J. Membr. Sci.*, 2023, **684**, 121843.
  28. T. Jiang, C. Wu, Y. Zhou, S. Cheng, S. Yang, H. Wei, Y. Ding and Y. Wu, *J. Membr. Sci.*, 2022, **647**, 120342.
  29. F. Zhang, Y. Zhang, L. Sun, C. Wei, H. Zhang, L. Wu, X. Ge and T. Xu, *Angew. Chem. Int. Ed.*, 2023, **62**, e202215017.
